# 1 scOpen: chromatin-accessibility estimation of 2 single-cell ATAC data

3 Zhijian Li<sup>1, +</sup>, Christoph Kuppe<sup>2, +</sup>, Mingbo Cheng<sup>1</sup>, Sylvia Menzel<sup>2</sup>, Martin Zenke<sup>3, 4</sup>,  
4 Rafael Kramann<sup>2, \*</sup>, and Ivan G. Costa<sup>1, \*</sup>

5 <sup>1</sup>Institute for Computational Genomics, Joint Research Center for Computational Biomedicine, RWTH Aachen  
6 University Medical School, 52074 Aachen, Germany

7 <sup>2</sup>Division of Nephrology and Clinical Immunology, RWTH Aachen University, 52074 Aachen, Germany

8 <sup>3</sup>Department of Cell Biology, Institute of Biomedical Engineering, RWTH Aachen University Medical School,  
9 Aachen, 52074, Germany

10 <sup>4</sup>Helmholtz Institute for Biomedical Engineering, RWTH Aachen University, Aachen, Germany

11 \*corresponding authors: [rkramann@ukaachen.de](mailto:rkramann@ukaachen.de), [ivan.costa@rwth-aachen.de](mailto:ivan.costa@rwth-aachen.de)

12 +these authors contributed equally to this work

## 13 ABSTRACT

**We propose scOpen, a computational method for quantifying the open chromatin status of regulatory regions from single cell ATAC-seq (scATAC-seq) experiments. scOpen is based on positive-unlabelled learning of matrices and estimates the probability that a region is open at a given cell by mitigating the sparsity of scATAC-seq matrices. We demonstrate that scOpen improves all down-stream analysis steps of scATAC-seq data as clustering, visualization and chromatin conformation. Moreover, we show the power of scOpen and single cell-based footprinting analysis (schINT) to dissect regulatory changes in the development of fibrosis in the kidney.**

## 15 Introduction

16 The simplicity and low cell number requirements of assay for transposase-accessible chromatin using sequenc-  
17 ing (ATAC-seq)<sup>1</sup> made it the standard method for detection of open chromatin enabling the first study of open  
18 chromatin of cancer cohorts<sup>2</sup>. Moreover, careful consideration of digestion events by the enzyme (Tn5), allowed  
19 insights on regulatory elements as positions of nucleosomes<sup>1,3</sup>, transcription factor binding sites and the activity  
20 level of transcription factors<sup>4</sup>. The combination of ATAC-seq with single cell sequencing (scATAC-seq)<sup>5</sup> further  
21 expanded ATAC-seq applications by measuring the open chromatin status of thousands of single cells from healthy<sup>6</sup>  
22 and diseased tissues<sup>7</sup>. Computational tasks for analysis of scATAC-seq include detection of novel cell types with  
23 clustering (scABC<sup>8</sup>, cisTopic<sup>9</sup>); identification of transcription factors regulating individual cells (chromVAR<sup>10</sup>); and

24 prediction of co-accessible DNA regions in groups of cells (Cicero<sup>11</sup>).

25 Usually, the first step in the analysis of scATAC-seq is detection of open chromatin regions by calling peaks  
26 on the scATAC-seq data by ignoring cell information. In a second step a matrix is built by counting the number of  
27 digestion events (reads) per cell in each of the previously detected regions. This matrix usually has a very high  
28 dimension ( $> 10^6$  regions) and a maximum of two digestion events are expected for a region per cell. As with scRNA-  
29 seq<sup>12-14</sup>, scATAC-seq is effected by dropout events due to loss of DNA material during library preparation. These  
30 characteristics imply that scATAC-seq count matrices are extremely sparse, i.e. 3% of non-zero entries. In contrast,  
31 scRNA-seq have less severe sparsity ( $> 10\%$  of non-zeros) than scATAC-seq due to smaller dimension ( $< 20,000$   
32 genes for mammalian genomes) and lower dropout rates for genes with high or moderate expression levels. So far,  
33 no computational approach addresses the extreme sparsity and low count characteristics of scATAC-seq data.

34 We here present scOpen, which uses positive-unlabelled (PU) learning<sup>15</sup> to find dropout events and to estimate  
35 the probability that a region is open in a particular cell. scOpen algorithm models dropout rates in a cell specific  
36 manner and can analyse large scATAC-seq matrices in a few minutes. The resulting probability matrix can then  
37 be used as input for usual computational methods for scATAC-seq data as clustering, visualisation and chromatin  
38 conformation (**Fig. 1a**). Moreover, we adapted the footprint based transcription factor activity score from HINT-ATAC<sup>4</sup>  
39 to infer TFs regulating clusters of scATAC-seq cells (schINT). We demonstrate the power of scOpen and schINT by  
40 the analysis of regulatory networks driving the development of fibrosis with a novel scATAC-seq time-course dataset  
41 of 31,000 cells in murine kidney.

## 42 Results

### 43 scOpen outperforms imputation methods on scATAC-seq cell clustering

44 We first tested if scOpen improves clustering of scATAC-seq data. For this, we made use of three public scATAC-  
45 seq data sets: blood cell progenitors (hematopoiesis)<sup>6</sup>; subsets of T cells<sup>7</sup> and a combination of six cell  
46 lines<sup>5</sup>. The use of a standard peak calling pipeline<sup>16</sup> detected 50,000 to 120,000 open chromatin regions with  
47 3-4% of non-zero entries, confirming the extreme sparsity of scATAC-seq data (**Supplementary Table 1**). We  
48 compared scOpen with imputation and matrix denoising methods proposed for scRNA-seq [MAGIC<sup>12</sup>, SAVER<sup>17</sup>,  
49 scImpute<sup>18</sup> and DCA<sup>19</sup>]; a scATAC-seq imputation method part of cisTopic (cisTopic-impute) and the raw count  
50 matrix. These matrices were given as input to a clustering method and evaluated with Adjusted Rand Index (ARI)<sup>20</sup>  
51 regarding the agreement with known cell labels as before<sup>9</sup>. Notably, scOpen outperforms all competing methods  
52 by presenting the highest ARI values in all three data sets (**Fig. 1b**). cisTopic performed well in Hematopoiesis  
53 and T cells, but failed in discerning some of the cell lines (**Supplementary Fig 1**). The discriminative power  
54 of scOpen is also supported by t-SNE<sup>21</sup> projections of these data sets, which indicate a clear separation of the  
55 majority of cell types ( **Supplementary Fig. 1-3**). Altogether, these results support that scOpen outperforms current

56 state-of-art imputation methods.

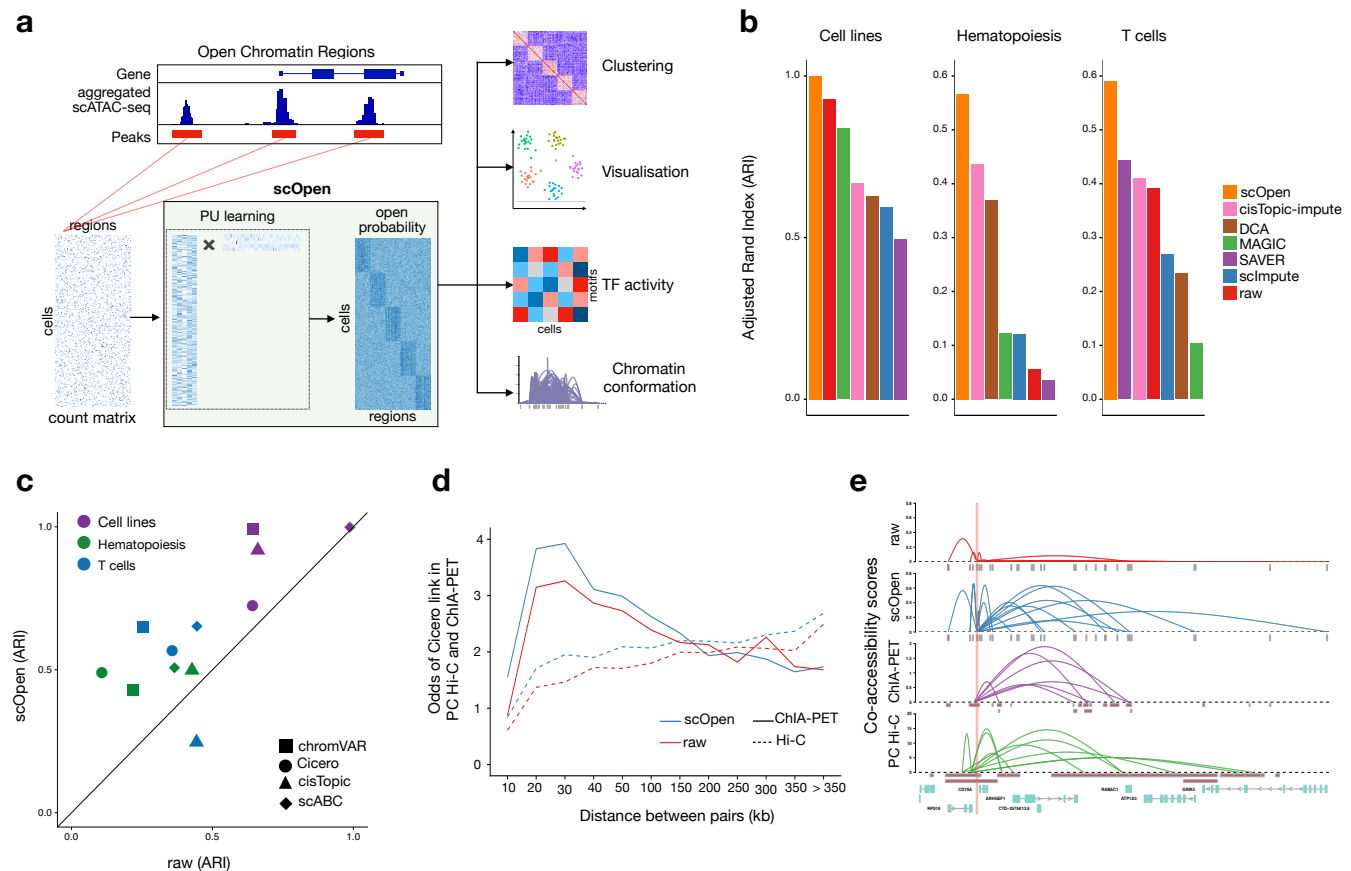

**Fig. 1. scOpen improves clustering and downstream analysis of scATAC-seq.** **a**, scOpen receives as input a sparse count matrix with number of reads per cell, where regions can be derived by peak calling based on an aggregated scATAC-seq library. After matrix binarisation, scOpen performs PU learning to find the probability of a region to be open in a cell by detection of dropout events. This matrix can then be given as input for usual scATAC-seq methods for clustering, visualisation and interpretation of regulatory features. **b**, Evaluation of clustering accuracy by applying distinct imputation/denoising methods to the scATAC-seq matrix in three benchmarking datasets. ARI values (y-axis) of 1 indicate a perfect agreement of the clustering with the true labels. **c**, Scatter plot comparing clustering results (ARI) of the three benchmarking datasets by providing raw (x-axis) and scOpen estimated matrices (y-axis) as input for state-of-art scATAC-seq methods (scABC, chromVAR, Cicero and cisTopic). **d**, Odds ratio (y-axis) of Cicero predicted co-accessible sites also supported by pol-II ChIA-PET (solid line) and PC Hi-C (dashed line) vs. distance between sites (x-axis). Red lines correspond to raw matrices and blue to scOpen estimated matrix. Odds ratio superior than 1 indicates a positive relationship. **e**, Visualisation of co-accessibility scores (y-axis) of Cicero predicted with raw (red) and scOpen (blue) estimated matrices contrasted with scores based on RNA pol-II ChIA-PET (purple) and promoter capture Hi-C (green) around the *CD79A* locus (x-axis). For ChIA-PET, the log-transformed frequencies of each interaction PET cluster represent co-accessibility scores, while the negative log-transformed p-values from the CHiCAGO software indicates Hi-C scores.

### 57 scOpen estimated matrix improves scATAC-seq analysis

58 Next, we tested the benefit of using scOpen estimated matrices as input for usual scATAC-seq methods, e.g.,  
 59 scABC<sup>8</sup>, chromVAR<sup>10</sup>, cisTopic<sup>9</sup> and Cicero<sup>11</sup>. Therefore we compared the clustering accuracy (ARI) of these four  
 60 methods with either raw or scOpen estimated matrices. scABC is the only evaluated method offering clustering as a

61 final result, while other methods (chromVAR, Cicero and cisTopic) first transform the scATAC-seq matrix to either  
62 transcription factors, genes or topics feature spaces. These features are provided as input for clustering as described  
63 before<sup>9</sup>. In 11 out of 12 combinations of methods and datasets, we observed a higher ARI whenever scOpen matrix  
64 was provided as input (**Fig. 1c**) as reflected in t-SNE plots (**Supplementary Fig. 4-6**). Moreover, the highest ARI  
65 for a given dataset always involved the use of scOpen estimated matrix. Prior to estimating gene centric open  
66 chromatin scores, Cicero first predicts co-accessible pairs of DNA regions in groups of cells. We compared Cicero  
67 predicted conformation with Hi-C and ChIA-PET on GM12878 cells as in<sup>11</sup> and observed that the use of scOpen  
68 matrix improves the detection of GM12878 interactions at both global (**Fig. 1d**) and individual levels (**Fig. 1e**). Taken  
69 together, these results indicate that the use of scOpen estimated matrices improves downstream analysis of state-of  
70 the art scATAC-seq methods.

### 71 **scOpen and footprinting analysis identifies novel hematopoietic progenitor subpopulations**

72 Visualisation of the scOpen estimated matrix using t-SNE indicates both known and novel sub-types of hematopoietic  
73 progenitor cells (**Fig. 2a**)<sup>6</sup>. To further explore this, we estimated the optimal number of clusters with gap statistic<sup>22</sup>,  
74 which indicates a total of 10 groups with sub-groups of known cell types (**Supplementary Fig. 7a-b**). While  
75 HSC/MPP, CMP and GMP sub-clusters resemble differentiation stages previously reported by Buenrostro and  
76 colleagues<sup>6</sup>, we observed that the MEP progenitors form two sub-populations of cells (**Fig. 2a; Supplementary**  
77 **Fig. 7c**), which have not been described before<sup>6,9</sup>. We characterised regulatory features (transcription factors)  
78 controlling these sub-clusters with chromVAR<sup>10</sup> and HINT-ATAC differential footprinting analysis<sup>4</sup>. We observed  
79 a good agreement between TFs activity scores predicted by chromVAR and HINT-ATAC (average  $R = 0.59$ ;  
80 **Supplementary Fig. 8**). Both HINT-ATAC and chromVAR indicate that the dimmer GATA:TAL has high activity at  
81 MEP1 but also at MEP2 clusters. Only HINT-ATAC detects high activity scores of KLF and NFY<sup>23</sup> family factors  
82 in MEP1 cells (**Fig. 2b-c; Supplementary Fig. 8**). Both GATA1 and TAL1 are important regulators of erythroid  
83 and megakaryocyte specification; KLF1 is known to bias differentiation towards erythroid cells<sup>24,25</sup>. Moreover, we  
84 observed higher open chromatin signals in the promoter of the megakaryocyte marker EPOR (and KLF1) in MEP1  
85 cells, while the erythroid marker GP1BA has higher open chromatin in MEP2 cells (**Fig. 2d**). These results indicate  
86 that MEP1 and MEP2 represent sub-populations of cells primed towards erythroid or megakaryocyte cell types,  
87 respectively. In short, we show how the combined use of scOpen and footprinting analysis with HINT-ATAC are able  
88 to detect and characterise two novel sub-group of cells.

### 89 **Novel insights into chromatin accessibility in key fibrosis driving cells by scOpen**

90 Next, we evaluated scOpen in its power to improve detection of cells in a complex disease data set. For this, we  
91 performed whole mouse kidney scATAC-seq in C57Bl6/WT mice in homeostasis (day 0) and at two time points after  
92 injury with fibrosis: 2 days and 10 days after Unilateral Ureteral Obstruction (UUO)<sup>26,27</sup>. Experiments recovered a

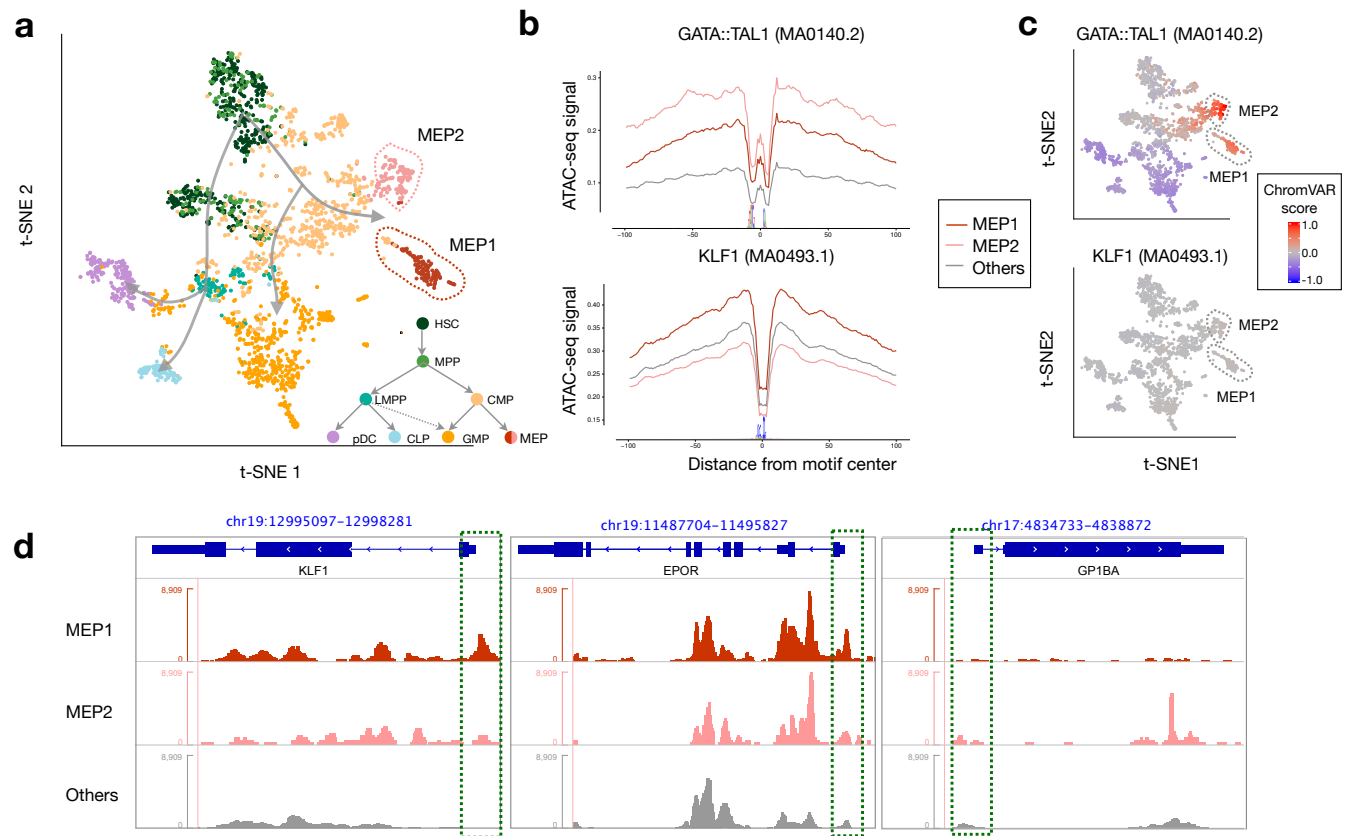

**Fig. 2. scOpen detects novel hematopoietic progenitors.** **a**, Visualisation of t-SNE projection of scOpen estimated matrix for hematopoiesis (HSC, hematopoietic stem cells; MPP, multipotent progenitors; LMPP, lymphoid primed multipotent progenitor; CMP, common myeloid progenitors; CLP, common lymphoid progenitors; pDC, plasmacytoid dendritic cells; GMP, granulocyte macrophage progenitors; MEP, megakaryocyte–erythroid progenitors). The t-SNE positions cells according to the known differentiation paths of these progenitor cells. Particular interesting are two sub-groups of MEP cells (MEP1 and MEP2), which have not been characterised before. **b**, Transcription factor footprints (average ATAC-seq around predicted binding sites) for the dimmer GATA1:TAL1 and KLF1 for MEP1, MEP2 and other cells. Logo of underlying sequences is shown below. **c**, chromVAR activity scores also reveal high GATA1:TAL1 activity, but no change in activity is found for KLF1 motifs. **d**, Normalised pseudo-bulk ATAC-seq coverage reveals distinct chromatin accessibility at promoters (green boxes) at erythroid (KLF1 and EPOR) and megakaryocyte (GP1BA) marker genes.

93 total of 31,670 high quality cells (average of 14,752 reads per cell) and displayed a high reproducibility ( $R > 0.99$ )  
 94 between duplicates (**Supplementary Fig. 9; Supplementary Tab. 1**). After data aggregation, 252,146 peaks were  
 95 detected, resulting in a highly dimensional and sparse scATAC-seq matrix (3.2% of non-zeros). Next, we performed  
 96 data integration for batch effect removal<sup>28</sup> using either raw matrix or scOpen estimated matrix (**Supplementary**  
 97 **Fig. 10**). For benchmarking purposes, we annotated the scATAC-seq profiles using the label transfer approach<sup>28</sup>  
 98 from an independent study of single nucleus RNA-seq of the same kidney fibrosis model<sup>29</sup>. Notably, we observed  
 99 that clusters on scOpen estimated matrices are more similar to transferred labels (higher ARI) than clusters based  
 100 on raw matrix for either integrated or day specific data (**Fig. 3a; Supplementary Fig. 10**). This again supports the  
 101 power of scOpen to mitigate scATAC-seq sparsity.

102 Clustering results of scOpen estimated matrices recovered all major kidney cell types including proximal tubular

103 cells (PT), distal/connecting tubular cells, collecting duct and loop of henle, endothelial cells, fibroblasts, immune  
104 cells, as well as the rare population of podocytes (**Fig. 3b**). Identity of clusters, which were initially characterised by  
105 transferred labels, are further supported by gene level scores of known marker genes (**Supplementary Fig. 11**). Of  
106 particular interest are cell types with population changes during progression of fibrosis (**Fig. 3c; Supplementary**  
107 **Fig. 12**). We observed an overall decrease of normal proximal tubular, glomerular and endothelial cells and increase  
108 of immune cells as expected in this fibrosis model with tubule injury, influx of inflammatory cells and capillary  
109 loss<sup>30,31</sup> (**Supplementary Fig. 12**). Importantly, we detected an increased frequency of a PT sub-population  
110 we identified as injured PT characterised by an increased accessibility around the widely used PT injury marker  
111 Kim1(Havrc1)<sup>32</sup>(**Supplementary Fig. 13**). Furthermore, the fibrosis driving myofibroblast population also showed  
112 a gradual increase over time after injury and was characterised by increased accessibility around Fln2 and  
113 Dcn<sup>33</sup> (**Supplementary Fig. 13**).

#### 114 **schINT dissects cell specific regulatory changes in fibrosis**

115 Next, we adapted HINT-ATAC<sup>4</sup> to dissect regulatory changes in scATAC-seq clusters (schINT). For each cluster, we  
116 created a pseudo bulk ATAC-seq library by combining reads from single cells in the cluster. We then performed  
117 footprinting analysis for each cluster and estimated TF activity scores for all footprint supported motifs. We only kept  
118 TFs with changes (high variance) in TF activity scores among clusters. We focussed here on clusters associated  
119 to proximal tubular (PT), fibroblast/myofibroblasts and immune cells, as these represent key players in kidney  
120 remodelling and fibrosis after injury. As shown in **Fig. 3d**, the TF activity scores capture regulatory programs  
121 associated to these 3 major cell populations. Interestingly, injured PTs have overall lower TF activity scores of all TFs  
122 of the PT cluster. TFs with high decrease in activity in injured PTs include Rxra, which is important for the regulation  
123 of calcium homeostasis in tubular cells<sup>34</sup>, and Hnf4a, which is important in proximal tubular development<sup>35</sup> (**Fig. 3e;**  
124 **Supplementary Fig. 13**). Footprint profiles of Rxra and Hnf4a in injured PTs display a gradual loss of TF activity  
125 over time indicating that injured PT acquire a dedifferentiated phenotype during fibrosis progression and tubule  
126 dilatation (**Fig. 3f; Supplementary Fig. 14**).

127 Interestingly, a group of TFs with high activity scores in injured PTs also have high TF activity scores in  
128 myofibroblasts (Smad2:Smad3 and Batf:Jun) or macrophages (Creb1) and lymphoid cells (Nfkb1) indicating shared  
129 regulatory programs in these cells. Smad proteins are downstream signals of TGF $\beta$  signalling, which is a known key  
130 player of fibroblast to myofibroblast differentiation and fibrosis<sup>36</sup>. Interestingly, high activity of Smad2::Smad3 also  
131 indicate a role of TGF $\beta$  in the expansion of injured PTs. High activity scores of Jun and Creb1 also support activation  
132 of TNF-alpha pathway, which is responsible for tubular apoptosis and necroptosis<sup>37</sup>. Nfkb1 is downstream of both  
133 TGF $\beta$  and TNF $\alpha$  signalling and promotes macrophage infiltration to further induce myofibroblasts<sup>38</sup>. Interestingly,  
134 Smad2:Smad3, Jun and Creb1 reach a peak in TF activity level in day 2 after UUO in injured PTs (**Fig. 3f;**  
135 **Supplementary Fig. 14**), which indicate these TFs are activated post-transcriptionally. Nfkb1, on the other hand,

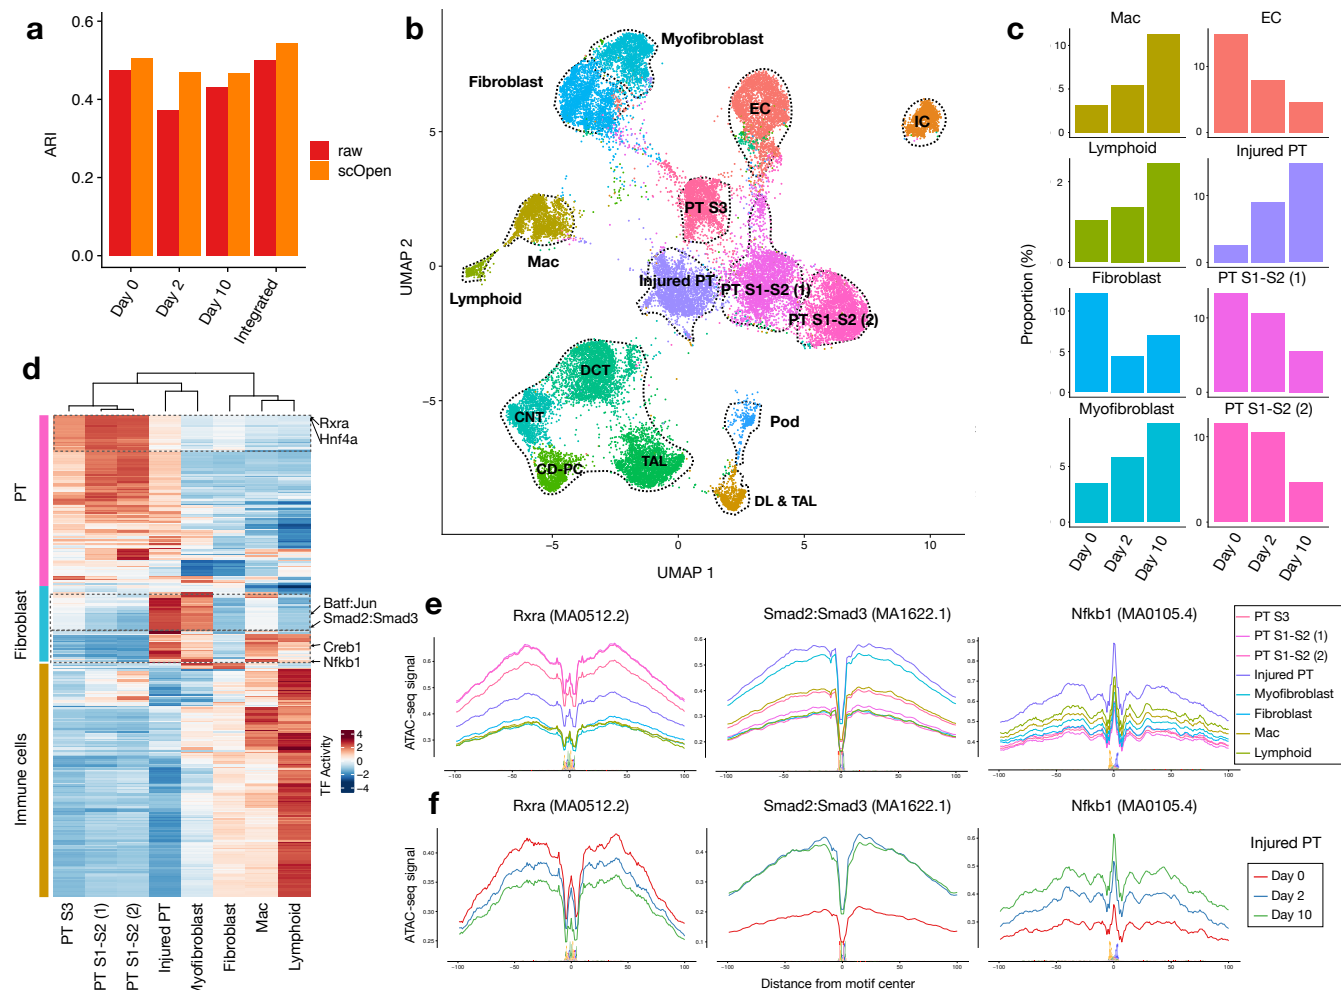

**Fig. 3. scOpen characterises progression of kidney fibrosis.** **a**, ARI values (y-axis) contrasting clustering results and transferred labels using either raw or scOpen estimated scATAC-seq. Clustering was performed by only considering UUO kidney cells on day 0 (WT), day 2 or day10 or the integrated data set (all days). **b**, UMAP visualisation of the integrated UUO scATAC-seq with major kidney cell types: myofibroblasts, fibroblasts, descending loop of Henle and thin ascending loop of Henle (DL & TAL); macrophages (Mac), Lymphoid (T and B cells), endothelial cells (EC), thick ascending loop of Henle (TAL), distal convoluted tubule (DCT), collecting duct-principal cell (CD-PC), intercalated cell (IC), podocyte (Pod) and proximal tubule cells (Injured PT; PT S1-S2 (1); PT S1-S2 (2); PT S3). **c**, Proportion of cells of selected clusters on either day 0, day 2 or day 10 experiments. **d**, Heatmap with TF activity score (z-transformed) for TFs (y-axis) and selected clusters (x-axis). Activity scores forms three major groups (left) associated to PT, fibroblast or immune cells. We highlight TFs with decrease in activity scores in injured PTs (Rxra and Hnf4a), with high TF activity scores in injured PTs and myofibroblasts (Batf:Jun; Smad2:Smad3) and myofibroblasts and immune cells (Creb1; Nfkb1). **e**, Transcription factor footprints (average ATAC-seq around predicted binding sites) for Rxra, Smad2::Smad3 and Nfkb1 factors for selected clusters. Logo of underlying sequences is shown below. **f**, Transcription factor footprints for Rxra, Smad2::Smad3 and Nfkb1 factors for injured PT cells in day 0, day 2 and day 10.

136 shows a gradual increase over time. This suggests that Nfkb1 is only transcriptionally activated as a downstream  
 137 effect of TGF $\beta$  signalling (Fig. 3f). Altogether, these results uncover a complex cascade of regulatory events across  
 138 cells during progression of fibrosis.

## 139 Discussion

140 The enzyme used in ATAC-seq (Tn5) will generate a maximum of 2 fragments per cell in a small (~200bp) open  
141 chromatin region. Subsequent steps of the ATAC-seq protocol cause loss of a large proportion of these fragments.  
142 For example, only DNA fragments with the two distinct Tn5 adapters, which are only present in 50% of the fragments,  
143 are amplified in the PCR step<sup>39</sup>. Further DNA material losses are expected during single cell isolation, liquid  
144 handling, sequencing or by simple financial restrictions of sequencing. Assuming that 25% of accessible DNA can  
145 be successfully sequenced, we expect that 56%<sup>1</sup> of accessible chromatin sites will not have a single digestion event  
146 causing the so-called dropout events. Despite this major signal loss, dropout events has been widely ignored in the  
147 scATAC-seq literature<sup>5-8,10,11</sup>.

148 scOpen is the first method for estimating the probability of open chromatin for single cell ATAC-seq data. We  
149 demonstrate here that clustering based on scOpen estimated matrices have a higher recovery of the correct cell  
150 labels, when compared to imputation methods for scRNA-seq<sup>12,17-19</sup> and the only imputation method tailored  
151 for scATAC-seq (cisTopic-impute<sup>9</sup>). Moreover, we have demonstrated that the use of scOpen corrected matrices  
152 as input improves the accuracy of existing state-of-art scATAC-seq methods (cisTopic<sup>9</sup>, chromVAR<sup>10</sup>, Cicero<sup>11</sup>).  
153 These results support the importance of dropout event correction with scOpen in any computational analysis of  
154 scATAC-seq. Of note, a sparsity similar to scATAC-seq are also expected in single cell protocols based on DNA  
155 encroachments as scChIP-seq<sup>40</sup>, scCUT&Tag<sup>41</sup>, scBisulfite-seq<sup>42</sup> just to cite a few. Modelling of dropout events in  
156 these protocols represents a future challenge.

157 The detection of transcription factors that impact on regulating cell differentiation and functions is another popular  
158 analysis of scATAC as performed by chromVAR<sup>10</sup>. For this, chromVAR considers the accessibility, i.e. number of  
159 ATAC-seq reads around motif predicted binding sites, inside ATAC-seq peaks. We have recently demonstrated the  
160 feasibility of footprinting analysis in bulk ATAC-seq data<sup>4</sup> and its advantages compared to approaches considering  
161 all motifs inside ATAC-seq peaks, as chromVAR. We present here a footprinting based approach for inferring TF  
162 factors controlling groups of single cells (schINT). In contrast to chromVAR, schINT consider both accessibility  
163 and footprint profiles for measuring TF activity. We demonstrate that footprints helps the characterisation of two  
164 sub-groups of megakaryocyte-erythrocyte progenitors by detecting TFs not identified by chromVAR. Moreover, we  
165 characterised complex cascades of regulatory changes associated to kidney fibrosis from the analysis of a whole  
166 kidney scATAC-seq data set. Our analysis demonstrates that major expanding population of cells, i.e. injured PTs,  
167 myofibroblasts and immune cells, share regulatory programs, which are associated with de-/differentiation and  
168 proliferation of particular cell types. Altogether, we demonstrate how scOpen and schINT can be used to dissect  
169 complex regulatory process driving a complex disease such as fibrosis in a highly heterogeneous organ.

---

<sup>1</sup>We assume digestion events follow a binomial distribution.



## 170 Methods

### 171 scOpen

172 scOpen uses positive-unlabelled (PU) learning of binary matrices to estimate the probability that a region is open  
173 at a particular cell<sup>15</sup>. Let  $X \in R^{m \times n}$  be the scATAC-seq matrix, where  $X_{ij}$  is the number of read start sites in peak  $i$   
174 and cell  $j$ ;  $m$  is the total number of peaks and  $n$  is the number of cells. We simplify the problem by defining a binary  
175 open/closed chromatin matrix  $\hat{X} \in \{0, 1\}^{m \times n}$ , i.e.

$$\hat{X}_{ij} = \begin{cases} 1 & X_{ij} > 0 \\ 0 & X_{ij} = 0 \end{cases} \quad (1)$$

176 where 1 indicates an open chromatin region and 0 indicates a closed chromatin region or a dropout (non-observed)  
177 event.

The major task in PU learning is to complete the matrix  $\hat{X}$  with additional positives (open regions) by detecting dropout events from the negative (or unlabelled) entries. For this, we estimate a matrix  $M \in [0, 1]^{m \times n}$  given the observation  $\hat{X}$ , where  $M$  parametrises a probability distribution that generates an unknown open/closed chromatin matrix  $Y$  such that

$$P(Y_{ij} = 1) = M_{ij} \quad (2)$$

$$P(Y_{ij} = 0) = 1 - M_{ij} \quad (3)$$

178 where  $0 \leq M_{ij} \leq 1$  represents the probability of the  $i$ th peak being open in cell  $j$ . For a given dropout rate ( $\rho$ ), the  
179 process of observing  $\hat{X}$  can be specified as:

$$P(\hat{X}_{ij} = 1) = (1 - \rho)M_{ij} \quad (4)$$

$$P(\hat{X}_{ij} = 0) = 1 - (1 - \rho)M_{ij} \quad (5)$$

180 The number of reads per cell varies largely in scATAC-seq suggesting that the above dropout sampling process is  
181 unlikely uniform. Therefore we introduce a cell specific dropout rate:

$$\rho_j = \rho_{max} \cdot \frac{\log(s_{max}) - \log(s_j)}{\log(s_{max}) - \log(s_{min})} \quad (6)$$

182 where  $s_j$  is the number of observed open chromatins for cell  $j$ ,  $s_{max}$  ( $s_{min}$ ) is the maximum (minimum) number of  
183 open chromatin events in a cell from  $\hat{X}$ .  $\rho_{max}$  is a pre-defined upper bound of dropout rate, which we set as 0.5 in  
184 scOpen. This parameter assumes a non-linear association between the number of open regions in a cell and the

185 drop-out probability.

186 The PU learning problem is based on estimating the matrix  $M$  by minimisation of the following optimisation  
187 problem:

$$\hat{M} = \operatorname{argmin} \sum_{i,j} (M_{ij} - \frac{1}{1-\rho_j} \hat{X}_{ij})^2 + \lambda \|M\|_*, \quad s.t. \quad 0 \leq M_{ij} \leq 1 \quad (7)$$

188 where  $\|M\|_* = \sum_i^k \sigma_i(M)$  is the nuclear norm of matrix  $M$ , and  $\sigma_i$  denotes the  $i$ th largest singular value of  $M$ . The first  
189 item is the unbiased estimator of square loss for each element in  $M$ <sup>15</sup> and  $\lambda$  is the regularisation parameter, which  
190 aims to prevent the model from over-fitting and set to 1 as default value. We assume that  $M$  is a low-rank matrix  
191 with rank  $k$  and the above problem can be written as:

$$\min_{W,H} f(W,H) = \sum_{ij} ((WH)_{ij} - \frac{1}{1-\rho_j} \hat{X}_{ij})^2 + \frac{\lambda}{2} \|W\|^2 + \frac{\lambda}{2} \|H\|^2, \quad s.t. \quad 0 \leq (WH)_{ij} \leq 1 \quad (8)$$

192 where  $W \in \mathbb{R}^{m \times k}, H \in \mathbb{R}^{k \times n}$ . This constrained optimisation problem is solved by using cyclic coordinate decent  
193 methods. This method iteratively updates the variable  $w_{it}$  in  $W$  to  $z$  by solving the following one-variable sub-problem.  
194 Likewise, the elements in  $H$  can be updated with similar update rule. The above iteration is carried out until a  
195 termination criterion is met, e.g. number of iteration performed.

196 The above constraints imposed long computational time requirements for large scATAC-seq matrices, due to the  
197 need to check consistence of all constraints at each optimisation step. We therefore relax  $0 \leq (WH)_{ij} \leq 1$  to  $0 \leq z$ .

$$\min_z f(z) = \sum_{j=1}^n ((\sum_{t'=k}^n w_{it'} h_{t'j} - w_{it} h_{tj}) + z h_{tj} - \frac{1}{1-\rho_j} \hat{X}_{ij})^2 + \frac{\lambda}{2} z^2, \quad s.t. \quad 0 \leq z \quad (9)$$

198 Afterwards, we calculate  $M$  as the product of  $W$  and  $H$  by ceiling values to 1. This algorithm has a theoretical time  
199 complexity of the algorithm is  $O((m+n)k)$  for a single iteration.

200 In our experiments, the ceiling operation was only performed to 0.2% of non-zero entries. Moreover, our  
201 constraint relaxation lowered the computational time, i.e. 70 folds in the hematopoiesis data set (5 minutes vs 350  
202 minutes), by reducing the number of optimization iterations.

### 203 scATAC-seq benchmarking datasets

204 The cell line dataset was obtained by combining single cell ATAC-seq data of BJ, H1-ESC, K562, GM12878, TF1  
205 and HL-60 from <sup>5</sup>, which was downloaded from gene expression omnibus (GEO) with accession number GSE65360.  
206 The hematopoiesis dataset includes scATAC-seq experiments of sorted progenitor cells populations: hematopoietic  
207 stem cells (HSC), multipotent progenitors (MPP), lymphoid-primed multi-potential progenitors (LMPP), common  
208 myeloid progenitors (CMP), common lymphoid progenitors (CLP), granulocyte-macrophage progenitors (GMP),

209 megakaryocyte–erythroid progenitors (MEP) and plasmacytoid dendritic cells (pDC)<sup>6</sup>. Sequencing libraries were  
210 obtained from GEO with accession number GSE96769. In both datasets, the original cell types were used as true  
211 labels for clustering as in previous work<sup>8,9</sup>. Finally, the T cell dataset is based on human Jurkat T cells, memory  
212 T cells, naive T cells and Th17 T cells obtained from GSE107816<sup>7</sup>. Labels of memory, naive and Th17 T cells  
213 were provided in Satpathy et al.<sup>7</sup> by comparing scATAC-seq profiles with bulk ATAC-seq of corresponding T cell  
214 subpopulations.

215 For each dataset, we processed the data similarly as in<sup>10</sup>. First, the adapter sequences and low-quality ends  
216 were trimmed from FastQ files using Trim Galore<sup>43</sup>. Reads were mapped to the genome hg19 using Bowtie2<sup>44</sup>  
217 with the following parameters (`-X 2000 --very-sensitive --no-discordant`), allowing paired end reads of up  
218 to 2 kb to align. Next, reads mapped to chrY, mitochondria and unassembled "random" contigs were removed.  
219 Duplicates were also removed with Picard<sup>45</sup> and reads were further filtered for alignment quality of >Q30 and  
220 required to be properly paired using samtools<sup>46</sup>. All reads were adjusted by offsetting +4 bp for forward strand and  
221 -5bp for reverse strand to represent the cleavage event centre<sup>1,4</sup>. We only kept reads from cells with at least 500  
222 unique fragments. We then created a pseudo-bulk ATAC-seq library by merging the filtered scATAC-seq profiles  
223 and called peaks using MACS2<sup>16</sup> with the following parameters (`--keep-dup auto --call-summits`). The peaks  
224 were extended  $\pm 250$ bp from the summits as in<sup>1</sup> and peaks overlapping with ENCODE blacklists (<http://mitra.stanford.edu/kundaje/akundaje/release/blacklists/hg19-human/>) were removed. Finally, a read  
225 count matrix was constructed with custom python script by counting the number of read start sites per cell in each  
226 peak, of which each row represents one peak and each column represents one cell. See Supplementary Table 1 for  
227 complete statistics associated to these data sets.  
228

## 229 **Benchmarking of imputation methods**

230 We compared the performance of scOpen with 5 distinct imputation approaches (MAGIC, SAVER, scImpute,  
231 DCA and cisTopic) in terms of clustering accuracy. In short, we performed imputation with these algorithms (see  
232 details below) on the benchmarking datasets, applied PCA (50 PCs) and clustered cell using k-medoids and  
233 Person correlation as in<sup>9</sup>, where  $k$  was set to the number of true cell types in each dataset. For visualisation  
234 purposes, we used t-SNE<sup>21</sup>. We used adjusted Rand index (ARI) to evaluate the clustering results<sup>20</sup> with labels from  
235 benchmarking data sets. The adjusted Rand index measures similarity between two data clusterings by correcting  
236 the chance of grouping elements. Specifically, given two partitions of a dataset  $D$  with  $n$  cells,  $U = \{U_1, U_2, \dots, U_r\}$   
237 and  $V = \{V_1, V_2, \dots, V_s\}$ , the number of common cells for each cluster  $i$  and  $j$  can be written as:

$$c_{ij} = |U_i \cap V_j| \quad (10)$$

238 where  $i \in \{1, 2, \dots, r\}$  and  $j \in \{1, 2, \dots, s\}$ . The ARI can be calculated as follows:

$$ARI = \frac{\sum_{ij} \binom{c_{ij}}{2} - [\sum_i \binom{a_i}{2} \sum_j \binom{b_j}{2}] / \binom{n}{2}}{\frac{1}{2} [\sum_i \binom{a_i}{2} + \sum_j \binom{b_j}{2}] - [\sum_i \binom{a_i}{2} \sum_j \binom{b_j}{2}] / \binom{n}{2}} \quad (11)$$

239 where  $a_i = \sum_{j=1}^s c_{ij}$  and  $b_j = \sum_i c_{ij}$ , respectively. The ARI has a maximum value 1 and an expected value 0, with  
240 1 indicating that the data clusterings are the exactly same and 0 indicating that the two data clusterings agree  
241 randomly.

## 242 **MAGIC**

243 MAGIC is an algorithm for alleviating sparsity and noise of single cell data using diffusion geometry<sup>12</sup>. We  
244 downloaded MAGIC from <https://github.com/KrishnaswamyLab/MAGIC> and applied it on the count matrix  
245 with default setting. Prior to MAGIC, the input was normalised by library size and root squared, as suggested by the  
246 authors<sup>12</sup>.

## 247 **SAVER**

248 SAVER is a method that recovers the true expression level of each gene in each cell by borrowing information  
249 across genes and cells<sup>17</sup>. We obtained SAVER from <https://github.com/mohuangx/SAVER> and ran it on the  
250 normalised tag count matrix with the default parameters.

## 251 **scImpute**

252 scImpute is a statistical method to accurately and robustly impute the dropouts in scRNA-seq data<sup>18</sup>. We downloaded  
253 scImpute from <https://github.com/Vivianstats/scImpute> and executed it using the default setting except  
254 for the number of cell clusters which is used to determine the candidate neighbours of each cell by scImpute. We  
255 defined this as the true cluster number for each benchmarking dataset.

## 256 **DCA**

257 DCA is a deep auto-encoder network for denoising scRNA-seq data by taking the count structure, over-dispersed  
258 nature and sparsity of the data into account<sup>19</sup>. We obtained DCA from <https://github.com/theislab/dca>  
259 and ran it with default setting.

## 260 **cisTopic-impute**

261 cisTopic is a probabilistic model to simultaneously identify cell states (topic-cell distribution) and cis-regulatory  
262 topics (region-topic distribution) from single cell epigenomics data<sup>9</sup>. We downloaded it from <https://github.com/aertslab/cisTopic>  
263 and ran it with different numbers of topics (from 5 to 50). The optimal number of  
264 topics was selected based on the highest log-likelihood as suggested in<sup>9</sup>. We then multiplied the topic-cell and the  
265 region-topic distributions to obtain the predictive distribution<sup>9</sup>, which describes the probability of each region in each  
266 cell and is used as imputed matrix for clustering and visualisation. We call this method as `cisTopic-impute`.

## 267 **Benchmarking of scATAC-seq methods**

268 Next, we compared the performance of state-of-art scATAC-seq methods (scABC, chromVAR and Cicero) when  
269 presented with scOpen estimated or raw scATAC-seq matrices. All methods were evaluated regarding clustering  
270 accuracy (as in “Evaluation of imputation methods”). Note that scABC is the only method providing a clustering  
271 solution. chromVAR, Cicero and cisTopic transform the scATAC-seq matrices into transcription factor, gene and  
272 topic feature spaces. These transformed matrices were used as input for PCA (50 PCs), k-medoids clustering, and  
273 t-SNE transformation as before<sup>9</sup>.

### 274 ***scABC***

275 scABC is an unsupervised clustering algorithm for single cell epigenetic data<sup>8</sup>. We downloaded it from [https://](https://github.com/SUwonglab/scABC)  
276 [github.com/SUwonglab/scABC](https://github.com/SUwonglab/scABC) and executed according to the tutorial [https://github.com/SUwonglab/](https://github.com/SUwonglab/scABC/blob/master/vignettes/ClusteringWithCountsMatrix.html)  
277 [scABC/blob/master/vignettes/ClusteringWithCountsMatrix.html](https://github.com/SUwonglab/scABC/blob/master/vignettes/ClusteringWithCountsMatrix.html).

### 278 ***chromVAR***

279 chromVAR is an R package for analysing sparse chromatin-accessibility data by measuring the gain or loss of  
280 chromatin accessibility within sets of genomic features, as regions with sequence predicted transcription factor (TF)  
281 binding sites<sup>10</sup>. We obtained chromVAR from <https://github.com/GreenleafLab/chromVAR> and executed  
282 to find gain/loss of chromatin accessibility in regions with binding sites of 571 TF motifs obtained in JASPAR version  
283 2018<sup>47</sup>.

### 284 ***Cicero***

285 Cicero is a method that predicts co-accessible pairs of DNA elements using single-cell chromatin accessibility  
286 data<sup>11</sup>. Moreover, Cicero provides a gene activity score for each cell and gene by assessing the overall accessibility  
287 of a promoter and its associated distal sites. This matrix was used for clustering and visualisation of scATAC-  
288 seq. We obtained Cicero from <https://github.com/cole-trapnell-lab/cicero-release> and executed  
289 it according to the document provided by [https://cole-trapnell-lab.github.io/cicero-release/](https://cole-trapnell-lab.github.io/cicero-release/docs/)  
290 [docs/](https://cole-trapnell-lab.github.io/cicero-release/docs/).

### 291 ***cisTopic***

292 We executed cisTopic as described above. Instead of using the multiplication of topic-cell and region-topic  
293 distributions as imputed matrix, we here directly used the topic-cell distribution (after choosing the number of topics  
294 with the log-likelihood method) for cell clustering via k-medoids as in<sup>9</sup>.

### 295 ***Chromosomal conformation experiments with Cicero***

296 We used conformation data to evaluate co-accessible pairs of cis-regulatory DNA as detected by Cicero on GM12878  
297 cells. For this, we replicated the analysis performed in Fig. 4 of<sup>11</sup> and contrasted the results of Cicero with raw or

298 scOpen estimated matrices. We obtained scATAC-seq matrix of GM12878 cells from GEO (GSM2970932). For  
299 evaluation, We downloaded promoter-capture (PC) Hi-C data of GM12878 from GEO (GSE81503) and used the  
300 provided CHiCAGO<sup>48</sup> score as physical proximity indicator. We also downloaded ChIA-PET data of GM12878 from  
301 GEO (GSM1872887) and used the frequency of each interaction PET cluster to represent how strong an interaction  
302 is. We only considered open chromatin regions overlapping with regions present at either ChIA-PET or Hi-C data as  
303 in<sup>11</sup>. ChIA-PET and Hi-C are used as true interactions. We compared the interactions predicted by Cicero to Hi-C  
304 interactions and ChIA-PET ligations using the built-in function *compare\_connections* of Cicero. We defined the  
305 argument *maxgap* as 1000bp to allow slop in the comparisons.

### 306 **Clustering and transcription factor activity analysis on hematopoiesis data**

307 We applied gap statistic<sup>22</sup> to determine the optimal number of clusters in hematopoiesis dataset for *k*-medoids  
308 clustering method . The gap statistic compares the total within intra-cluster variation for different values of *k* with  
309 their expected values under null reference distribution of the data. The optimal *k* will be value that yields the largest  
310 gap statistic, which is *k* = 10. Next, for each obtained cluster, we merged scATAC-seq profiles using samtools<sup>46</sup>  
311 to create a cluster-specific ATAC-seq library and detected peaks with MACS2<sup>16</sup>. Based on these peaks, we used  
312 HINT-ATAC<sup>4</sup> to predict footprints and identified all binding sites of a particular TF overlapping with footprints by using  
313 its motif from JASPAR version 2018<sup>47</sup>. We then calculated activity score for the TF in each cluster as previously  
314 described<sup>4</sup>. As chromVAR generates a TF activity score for each single cell, we summed up the scores of a TF for  
315 each cluster to allow for a comparison between chromVAR and HINT-ATAC. For visualisation, we used deeptools<sup>49</sup>  
316 to generate a coverage track for MEP1, MEP2 and other clusters after normalisation by counts per million mapped  
317 reads (CPM) as shown in Fig. 2d.

### 318 **scATAC-seq UUO mouse kidney datasets**

#### 319 ***Animal experiments***

320 Unilateral Ureter Obstruction (UUO) was performed as previously described<sup>27</sup>. Briefly, after flank incision, the left  
321 ureter was tied off at the level of the lower pole with two 7.0 ties (Ethicon). One C57BL/6 male mouse was sacrificed  
322 on day 0 (sham), day 2 and 10 after the surgery. Kidneys were snap-frozen immediately after sacrifice. Animal  
323 experiment protocols were approved by the LANUV-NRW, Germany. All animal experiments were carried out in  
324 accordance with their guidelines.

#### 325 ***scATAC experiments***

326 Nuclei isolation was performed as recommended by 10X Genomics (demonstrated protocol CG000169). The nuclei  
327 concentration was verified using stained nuclei in a Neubauer chamber with trypan-blue targeting a concentration of  
328 10.000 nuclei. Tn5 incubation and library prep followed the 10X scATAC protocol. After quality check using Agilent  
329 BioAnalyzer, libraries were pooled and run on a NextSeq in 2x75bps paired end run using three runs of the the

330 NextSeq 500/550 High Output Kit v2.5 Kit (Illumina). This results in more than 600 million reads.

### 331 ***UO data processing***

332 We used Cell-Ranger ATAC (version-1.1.0) pipeline to perform low level data processing (<https://support.10xgenomics.com/single-cell-atac/software/pipelines/latest/algorithms/overview>). We first  
333 demultiplexed raw base call files using cellranger-atac mkfastq with its default setting to generate FASTQ files for  
334 each flowcell. Next, cellranger-atac count was applied to perform read trimming and filtering, alignment, peak calling  
335 and barcode counting for each sample independently. Next, we used cellranger-atac aggr to combine reads from all  
336 experiments, which includes a new peak calling round. The normalisation model was set as "None" to obtain a  
337 matrix of raw counts. We performed cell detection by using the fraction of reads in peaks (FRiP) and number of  
338 unique fragments to filter low quality cells. Briefly, we only kept the cells that had at least 55% of fragments in peaks  
339 and 1,000 unique fragments for downstream analysis (**Supplementary Fig. 9**).

341 Next, we used the R package Seurat (version 3.1.0) to integrate the scATAC-seq profiles from different condi-  
342 tions (day 0, day 2 and day 10) using default parameters. For this, we first selected a subset of peaks that exhibit  
343 high variability across cells for each dataset (top 2000 peaks), which were used as anchors for cell integration <sup>28</sup>.  
344 Finally, an integrated matrix was obtained by subtracting the transformation matrix from the original matrix. The  
345 previous step was performed on both scOpen estimated and raw scATAC-seq matrices. Finally, we performed  
346 PCA analysis (30 PCs) and used k-medoids for clustering of scOpen and raw integrated scATAC-seq matrices. For  
347 benchmarking purposes the same analysis was also performed for each day separately.

### 348 ***Label transfer and cluster annotation***

349 We annotated the cells/clusters by using the label transfer approach in Seurat3<sup>28</sup>. To do this, we first downloaded a  
350 publicly available single-nucleus RNA-seq (snRNA-seq) dataset of the same fibrosis model (GSE119531). This  
351 dataset contains 6147 single-nucleus transcriptomes with 17 unique cell types<sup>29</sup>. For the label transfer, we created  
352 a gene activity matrix for the integrated scATAC-seq data by accessing the chromatin accessibility associated with  
353 each gene in each cell using the R package Signac (version 0.1.4; <https://github.com/timoast/signac>).  
354 Briefly, we extracted gene coordinates for mouse genome from EnsembleDB with EnsDb.Mmusculus.v79 and  
355 extended them to include the 2kb upstream region. We then counted the number of fragments that map to each of  
356 these regions for each cell using the function FeatureMatrix. Next, we transferred the cell types from snRNA-seq  
357 dataset to the integrated scATAC-seq dataset by using the function FindTransferAnchors and TransferData in  
358 Seurat3<sup>28</sup>. These labels were used as true labels on the evaluation of clustering results using the ARI as before.

359 For biological interpretation, we have named the cluster by assigning the label with highest proportion of cells to  
360 the cluster (see **Supplementary File 1**). Most clusters were assigned to a single cell type with the exception of  
361 clusters 4 and 5, which both had a similar proportion of proximal tubular (PT) S1 and S2 cells. Also, the clustering  
362 divided fibroblast population in two clusters (9 and 13). We have characterised cluster 13 as myofibroblasts given

363 the increase of accessibility of markers *Fbln2* and *Dcn* in contrast to cluster 9 (fibroblast) (**Supplementary Fig. 11**).  
364 We also renamed the cells, which were label as *Mac2* in Wu et al. 2019<sup>29</sup>, as lymphoid cells given that these cells  
365 express B and T cell markers *Ltb* and *Cd1d*, but not macrophage markers *C1qa* and *C1qb* (**Supplementary Fig. 11**).  
366 Finally, cluster 16 (labelled as proliferative PTs) was removed due to the high number of reads of valid reads in cells  
367 (58,000 in proliferative PTs vs 15,000 in other cells), which indicates that it is formed by mutiplets (**Supplementary**  
368 **File 1**).

### 369 **Transcription factor analysis with schINT**

370 Next, we performed a differential TF activity analysis using transcription factor footprints predicted by HINT-ATAC.  
371 In short, we create pseudo bulk atac-seq libraries by combining reads of cells for each cluster and performed  
372 footprinting with HINT-ATAC. Next, we predicted TF binding sites by motif analysis (FDR = 0.0001) inside footprint  
373 sequences using RGT (Version RGT-0.12.3; <https://github.com/CostaLab/reg-gen>). Motifs were obtained  
374 from JASPAR Version 2020<sup>50</sup>. We measured the average digestion profiles around all binding sites of a given  
375 TF for each pseudo bulk ATAC-seq library. We used then the protection score<sup>4</sup>, which measures the cell specific  
376 activity of a factor by considering number of digestion events around the binding sites and depth of the footprint.  
377 Higher protection scores indicate higher activity (binding) of that factor. Finally, we only considered TFs with more  
378 than 1.000 binding sites, with a variance in activity score higher than 0.3. See **Supplementary File 1** for complete  
379 activity scores results. We also have devised a smoothing approach for visualisation of average footprint profiles.  
380 In short, we performed a trimmed mean smoothing (5 bps window) and ignored cleavage values in the top 97.5%  
381 quantile for each average profile. We denote this novel approach to measure footprint based TF activity scores from  
382 scATAC-seq clusters schINT.

### 383 **Data availability**

384 The scATAC-seq data generated from UJO mouse kidney have been deposited in NCBI's Gene Expression Omnibus  
385 and are accessible through GEO Series accession number [GSE139950](https://www.ncbi.nlm.nih.gov/geo/query/acc.cgi?acc=GSE139950).

### 386 **Code availability**

387 The scOpen code is available at <https://github.com/CostaLab/scopen> and can be installed by `pip install`  
388 `scopen`. Code and tutorial for the use of schINT with the hematopoetic data set is provided in [https://www.](https://www.regulatory-genomics.org/hint/tutorial-differential-footprints-on-scatac-seq/)  
389 [regulatory-genomics.org/hint/tutorial-differential-footprints-on-scatac-seq/](https://www.regulatory-genomics.org/hint/tutorial-differential-footprints-on-scatac-seq/).

### 390 **Acknowledgements**

391 This work was funded by grants of the Interdisciplinary Center for Clinical Research (IZKF) Aachen, RWTH Aachen  
392 University Medical School, Aachen, Germany and by the Deutsche Forschungsgemeinschaft (DFG-GE 2811/3)  
393 to I.C. and (DFG SFB/TRR57 P30, SFB/TRR219 P5) and a Grant of the European Research Council (ERC-StG



394 677448) to R.K.. Simulations were performed with computing resources granted by ITC RWTH Aachen University  
395 under project rwth0233 and rwth0429. C.K. was partly funded by the clinician scientist program of the German  
396 Society of Internal Medicine (DGIM) and a Gerok position of the DFG SFB/TRR 219, P5.

## 397 **Author contributions**

398 Z.L., I.C., C.K., R.K. conceived the experiments, Z.L., C.K., M.C. and S.M. conducted the experiments. All authors  
399 analysed the results and reviewed the manuscript.

## 400 **Competing interests**

401 The authors declare no competing interests.

## 402 **References**

- 403 **1.** Buenrostro, J. D., Giresi, P. G., Zaba, L. C., Chang, H. Y. & Greenleaf, W. J. Transposition of native chromatin  
404 for fast and sensitive epigenomic profiling of open chromatin, DNA-binding proteins and nucleosome position.  
405 *Nat. methods* **10**, 1213 (2013).
- 406 **2.** Corces, M. R. *et al.* The chromatin accessibility landscape of primary human cancers. *Science* **362** (2018).
- 407 **3.** Schep, A. N. *et al.* Structured nucleosome fingerprints enable high-resolution mapping of chromatin architecture  
408 within regulatory regions. *Genome Res.* **25**, 1757–1770 (2015).
- 409 **4.** Li, Z. *et al.* Identification of transcription factor binding sites using atac-seq. *Genome Biol.* **20**, 45 (2019).
- 410 **5.** Buenrostro, J. D. *et al.* Single-cell chromatin accessibility reveals principles of regulatory variation. *Nature* **523**,  
411 486 (2015).
- 412 **6.** Buenrostro, J. D. *et al.* Integrated single-cell analysis maps the continuous regulatory landscape of human  
413 hematopoietic differentiation. *Cell* **173**, 1535–1548 (2018).
- 414 **7.** Satpathy, A. T. *et al.* Transcript-indexed ATAC-seq for precision immune profiling. *Nat. Medicine* **24**, 580–590  
415 (2018).
- 416 **8.** Zamanighomi, M. *et al.* Unsupervised clustering and epigenetic classification of single cells. *Nat. communica-*  
417 *tions* **9**, 2410 (2018).
- 418 **9.** Bravo González-Blas, C. *et al.* cisTopic: cis-regulatory topic modeling on single-cell ATAC-seq data. *Nat.*  
419 *Methods* **16**, 397–400 (2019).
- 420 **10.** Schep, A. N., Wu, B., Buenrostro, J. D. & Greenleaf, W. J. chromVAR: inferring transcription-factor-associated  
421 accessibility from single-cell epigenomic data. *Nat. methods* **14**, 975 (2017).

- 422 **11.** Pliner, H. A. *et al.* Cicero Predicts cis-Regulatory DNA Interactions from Single-Cell Chromatin Accessibility  
423 Data. *Mol. Cell* (2018).
- 424 **12.** Van Dijk, D. *et al.* Recovering gene interactions from single-cell data using data diffusion. *Cell* **174**, 716–729  
425 (2018).
- 426 **13.** Gong, W., Kwak, I.-Y., Pota, P., Koyano-Nakagawa, N. & Garry, D. J. DrlImpute: imputing dropout events in  
427 single cell RNA sequencing data. *BMC bioinformatics* **19**, 220 (2018).
- 428 **14.** Becht, E. *et al.* Dimensionality reduction for visualizing single-cell data using UMAP. *Nat. biotechnology* **37**, 38  
429 (2019).
- 430 **15.** Hsieh, C.-J., Natarajan, N. & Dhillon, I. S. PU Learning for Matrix Completion. In *ICML*, 2445–2453 (2015).
- 431 **16.** Zhang, Y. *et al.* Model-based analysis of ChIP-Seq (MACS). *Genome biology* **9**, R137 (2008).
- 432 **17.** Huang, M. *et al.* SAVER: gene expression recovery for single-cell RNA sequencing. *Nat. methods* **15**, 539  
433 (2018).
- 434 **18.** Li, W. V. & Li, J. J. An accurate and robust imputation method scImpute for single-cell RNA-seq data. *Nat.*  
435 *communications* **9**, 997 (2018).
- 436 **19.** Eraslan, G., Simon, L. M., Mircea, M., Mueller, N. S. & Theis, F. J. Single-cell RNA-seq denoising using a deep  
437 count autoencoder. *Nat. communications* **10**, 390 (2019).
- 438 **20.** Hubert, L. & Arabie, P. Comparing partitions. *J. classification* **2**, 193–218 (1985).
- 439 **21.** Maaten, L. v. d. & Hinton, G. Visualizing data using t-SNE. *J. machine learning research* **9**, 2579–2605 (2008).
- 440 **22.** Tibshirani, R., Walther, G. & Hastie, T. Estimating the number of clusters in a data set via the gap statistic.  
441 *Journal of the Royal Statistical Society: Series B (Statistical Methodology)* **63**, 411–423 (2001).
- 442 **23.** Huang, D. Y. *et al.* GATA-1 and NF-Y cooperate to mediate erythroid-specific transcription of Gfi-1B gene.  
443 *Nucleic Acids Res.* (2004).
- 444 **24.** Frontelo, P. *et al.* Novel role for EKLF in megakaryocyte lineage commitment. *Blood* (2007).
- 445 **25.** Bouilloux, F. *et al.* EKLF restricts megakaryocytic differentiation at the benefit of erythrocytic differentiation.  
446 *Blood* (2008).
- 447 **26.** Kramann, R. *et al.* Pharmacological gli2 inhibition prevents myofibroblast cell-cycle progression and reduces  
448 kidney fibrosis. *The J. clinical investigation* **125**, 2935–2951 (2015).
- 449 **27.** Kramann, R. *et al.* Perivascular gli1+ progenitors are key contributors to injury-induced organ fibrosis. *Cell*  
450 *stem cell* **16**, 51–66 (2015).
- 451 **28.** Stuart, T. *et al.* Comprehensive Integration of Single-Cell Data. *Cell* (2019).

- 452 **29.** Wu, H., Kirita, Y., Donnelly, E. L. & Humphreys, B. D. Advantages of Single-Nucleus over Single-Cell RNA  
453 Sequencing of Adult Kidney: Rare Cell Types and Novel Cell States Revealed in Fibrosis. *J. Am. Soc. Nephrol.*  
454 **30**, 23–32 (2019).
- 455 **30.** Bábíčková, J. *et al.* Regardless of etiology, progressive renal disease causes ultrastructural and functional  
456 alterations of peritubular capillaries. *Kidney international* **91**, 70–85 (2017).
- 457 **31.** Kramann, R. *et al.* Parabiosis and single-cell rna sequencing reveal a limited contribution of monocytes to  
458 myofibroblasts in kidney fibrosis. *JCI insight* **3** (2018).
- 459 **32.** Vaidya, V. S., Ramirez, V., Ichimura, T., Bobadilla, N. A. & Bonventre, J. V. Urinary kidney injury molecule-1:  
460 a sensitive quantitative biomarker for early detection of kidney tubular injury. *Am. journal physiology. Ren.*  
461 *physiology* **290**, F517–29 (2006).
- 462 **33.** Guerrero-Juarez, C. F. *et al.* Single-cell analysis reveals fibroblast heterogeneity and myeloid-derived adipocyte  
463 progenitors in murine skin wounds. *Nat. Commun.* **10**, 650 (2019).
- 464 **34.** Sugawara, A., Sanno, N., Takahashi, N., Osamura, R. Y. & Abe, K. Retinoid X receptors in the kidney: their  
465 protein expression and functional significance. *Endocrinology* **138**, 3175–80 (1997).
- 466 **35.** Marable, S. S., Chung, E., Adam, M., Potter, S. S. & Park, J.-S. Hnf4a deletion in the mouse kidney phenocopies  
467 Fanconi renotubular syndrome. *JCI Insight* **3**, 354–80 (2018).
- 468 **36.** Kramann, R., DiRocco, D. P. & Humphreys, B. D. Understanding the origin, activation and regulation of  
469 matrix-producing myofibroblasts for treatment of fibrotic disease. *The J. pathology* **231**, 273–289 (2013).
- 470 **37.** Misseri, R. *et al.* TNF-alpha mediates obstruction-induced renal tubular cell apoptosis and proapoptotic  
471 signaling. *Am. journal physiology. Ren. physiology* **288**, F406–11 (2005).
- 472 **38.** Tashiro, K. *et al.* Attenuation of renal fibrosis by proteasome inhibition in rat obstructive nephropathy: possible  
473 role of nuclear factor kappaB. *Int. journal molecular medicine* **12**, 587–92 (2003).
- 474 **39.** Buenrostro, J. D., Wu, B., Chang, H. Y. & Greenleaf, W. J. ATAC-seq: A Method for Assaying Chromatin  
475 Accessibility Genome-Wide. *Curr. Protoc. Mol. Biol.* **109** (2015).
- 476 **40.** Rotem, A. *et al.* Single-cell ChIP-seq reveals cell subpopulations defined by chromatin state. *Nat. Biotechnol.*  
477 **33**, 1165–1172 (2015).
- 478 **41.** Kaya-Okur, H. S. *et al.* CUT&Tag for efficient epigenomic profiling of small samples and single cells. *Nat.*  
479 *Commun.* **10**, 1930 (2019).
- 480 **42.** Smallwood, S. A. *et al.* Single-cell genome-wide bisulfite sequencing for assessing epigenetic heterogeneity.  
481 *Nat. Methods* **11**, 817–820 (2014).

- 482 **43.** Martin, M. Cutadapt removes adapter sequences from high-throughput sequencing reads. *EMBnet. journal* **17**,  
483 10–12 (2011).
- 484 **44.** Langmead, B. & Salzberg, S. L. Fast gapped-read alignment with Bowtie 2. *Nat. methods* **9**, 357 (2012).
- 485 **45.** Institute, B. Picard tools. <http://broadinstitute.github.io/picard/> (2019). Accessed: 2019-01-01;  
486 version 2.18.22.
- 487 **46.** Li, H. *et al.* The sequence alignment/map format and samtools. *Bioinformatics* **25**, 2078–2079 (2009).
- 488 **47.** Khan, A. *et al.* JASPAR 2018: Update of the open-access database of transcription factor binding profiles and  
489 its web framework. *Nucleic Acids Res.* **46**, D260–D266 (2018).
- 490 **48.** Cairns, J. *et al.* Chicago: robust detection of dna looping interactions in capture hi-c data. *Genome Biol.* **17**,  
491 127 (2016).
- 492 **49.** Ramírez, F. *et al.* deeptools2: a next generation web server for deep-sequencing data analysis. *Nucleic acids*  
493 *research* **44**, W160–W165 (2016).
- 494 **50.** Fornes, O. *et al.* Jaspas 2020: update of the open-access database of transcription factor binding profiles.  
495 *Nucleic acids research* **1** (2019).
